# Supplementary material
Source: PubMed Central journal article supplement (PMC2329698)
Supplement: 0801981105_Supplemental_PDF.pdf [file 0801981105_Supplemental_PDF.pdf]

# Supporting Information

Wang *et al.* . 10.1073/pnas.0801981105

**Table S1. Quantitative PCR analysis of mRNAs in the adipose, liver, and muscle tissues of *db/db* and *db/db-tg* mice using 36B4 as the invariant control**

| Genes | Genotype        | Tissues          |               |                 |
|-------|-----------------|------------------|---------------|-----------------|
|       |                 | Fat              | Liver         | Muscle          |
| MCP-1 | <i>db/db</i>    | 0.51 ± 0.19      | 3.88 ± 0.63   | 0.20 ± 0.06     |
|       | <i>db/db-tg</i> | 0.57 ± 0.20      | 3.25 ± 1.12   | 0.46 ± 0.19     |
|       | <i>P</i> value  | 0.793            | 0.564         | 0.263           |
| SAA-1 | <i>db/db</i>    | 0.0009 ± 0.00038 | 0.39 ± 0.11   | 0.0014 ± 0.0007 |
|       | <i>db/db-tg</i> | 0.0002 ± 0.00016 | 0.47 ± 0.21   | 0.0030 ± 0.0005 |
|       | <i>P</i> value  | 0.109            | 0.67          | 0.026           |
| IL-1β | <i>db/db</i>    | 0.99 ± 0.65      | 2.71 ± 1.48   | 0.14 ± 0.02     |
|       | <i>db/db-tg</i> | 1.36 ± 0.16      | 1.46 ± 0.13   | 0.16 ± 0.06     |
|       | <i>P</i> value  | 0.492            | 0.306         | 0.612           |
| IL-6  | <i>db/db</i>    | 0.018 ± 0.011    | 0.21 ± 0.17   | 0.064 ± 0.01    |
|       | <i>db/db-tg</i> | 0.008 ± 0.002    | 0.20 ± 0.10   | 0.054 ± 0.02    |
|       | <i>P</i> value  | 0.192            | 0.41          | 0.27            |
| CRP   | <i>db/db</i>    | 0.020 ± 0.004    | 1.61 ± 0.23   | 0.007 ± 0.0014  |
|       | <i>db/db-tg</i> | 0.031 ± 0.009    | 3.04 ± 0.69   | 0.006 ± 0.0027  |
|       | <i>P</i> value  | 0.183            | 0.05          | 0.416           |
| TNF-α | <i>db/db</i>    | 0.088 ± 0.018    | 0.296 ± 0.126 | 0.057 ± 0.017   |
|       | <i>db/db-tg</i> | 0.111 ± 0.103    | 0.352 ± 0.164 | 0.119 ± 0.080   |
|       | <i>P</i> value  | 0.772            | 0.719         | 0.296           |

**Table S2. The sequences of SYBR Green PCR primers used in this study**

| Genes           | Accession no. | Forward primer            | Reverse primer               |
|-----------------|---------------|---------------------------|------------------------------|
| AMPK $\alpha$ 1 | XM_139298     | CAGTAGGTACACACAGCGTAACACA | ACCTGTTACAGCAAATTC AAATGG    |
| AMPK $\alpha$ 2 | XM_131633     | TCCAGCACAGCTGAGAACCA      | GGGATGCCGAGGACAAAGT          |
| PPAR $\alpha$   | X57638        | CTGCAGAGCAACCATCCAGAT     | GCCGAAGGTCCACCATTIT          |
| PPAR $\gamma$   | NM_011146     | CACAATGCCATCAGGTTTGG      | GCTGGTCGATACTCTGGAGATC       |
| PGC1 $\alpha$   | AF049330      | GATGGCACGCAGCCCTAT        | CATTGTTGATGTGTGCGCTTCTTGCT   |
| LXR $\alpha$    | AF085745      | AGGAGTGTGACTTCGCAAA       | CTCTTCTGCCCCTCAGTTT          |
| RXR $\alpha$    | M84817        | TGCCCCATCCCTCAGGAAA       | GCGGTCCCCACAGATAGC           |
| SREBP-1c        | NM_011480     | GGCACTAAGTGCCCTCAACCT     | TGCGCAGGAGATGTATCTCCA        |
| C/EBP $\alpha$  | NM_007678     | GCGCAAGAGCCGAGATAAAG      | CGGTCAATGTACTGGTCAACT        |
| C/EBP $\beta$   | NM_009883     | CGCCTTTAGACCCATGGAAG      | CCCGTAGGCCAGGCAGT            |
| C/EBP $\delta$  | NM_007679     | TCCACGACTCCTGCCATGTA      | GCGGCCATGGAGTCAATG           |
| Pref-1          | NM_010052     | AATAGACGTTCCGGGCTTGCA     | TCCAGGTCCACGCAAGTTCATTGTT    |
| Insig-1         | NM_153526     | TTTGTGGTGGACATTTGATCGT    | CCC GAAGCGGCTTGGGG           |
| FOXO1           | NM_019739     | ACCCACCTGGACATGCA         | GCAGATGTGTGAGGCATGGT         |
| FOXO2           | NM_013519     | GCAAGGCTGGCAGAACAG        | CGGCACCTTCACGAAGCA           |
| IR              | J05149        | CGAGTGCCCGTCTGGCTATA      | GGCAGGGTCCCAGACATG           |
| IRS1            | NM_010570     | GCGGGCTGACTCCAAGAAC       | GCTATCCGCGGCAATGG            |
| IRS2            | L24563        | GGAGAACCCAGACCCTAAGCTACT  | GATGCCTTTGAGGCCTTCAC         |
| ACO             | NM_015729     | GCCAATGCTGGTATCGAAGAA     | GGAATCCCACTGCTGTGAGAA        |
| CPT1            | NM_013495     | ACCACTGGCCGAATGTCAAG      | AGCGAGTAGCGCATGGTCAT         |
| ACC $\alpha$    | AF374169      | CCCAGCAGAATAAAGTACTTTGG   | TGAGCATGGCATCCGGCGACT        |
| ACC $\beta$     | AF290178      | AACTCCCTGCCAAGCTCATG      | AGGCCTCCGAGGAAACCCACTGTCTT   |
| FAS             | XM_126624     | CCTGGATAGCATTCCGAACCT     | CCTGAGGGACCCTACCGCATAGC      |
| GPAT            | NM_008149     | GTGACCTTCGATTATGCGATCA    | CAACACCATCCCCGACATC          |
| DGAT1           | NM_010046     | TCCGCCTCTGGGCATTC         | GAATCGGCCACAAATCCA           |
| DGAT2           | AF384160      | CCGCAAAGGCTTTGTGAA        | GGAATAAGTGGGAACCAGATCAG      |
| MCD             | BC004764      | CCGCTACTACCTGGAGGAGACA    | ATCTGCTCGGAAGCTTTGATG        |
| SCD-1           | NM_009127     | CCTTCGACTACTCTGCCAGTGA    | TACCGCTGGCACATCAACTCCACC     |
| Leptin          | U22421        | AACCCTCATCAAGACCATTGTCA   | ATCAATGACATTTACACACGCAGTC    |
| Resistin        | NM_022984     | AGGGCTTGATTCTGGAAACTAC    | TCAGTGCCCATGTGGAAGTG         |
| Adiponectin     | NM_009605     | TGTTGGAATGACAGGAGCTGAA    | TGAACGCTGAGCGATACACAT        |
| Lepr-b          | U58861        | CTTTGTACCTTACATGCCCAAT    | AGTCACACATCTTATCTCCATTATCTTG |
| SOCS3           | NM_007707     | CACCTGGACTCCTATGAGAAAAGTG | GAGCATCATACTGATCCAGGAACT     |
| TNF- $\alpha$   | D84199        | TGGGACAGTGACCTGGACTGT     | AGTGAATTCGGAAAAGCCCAT        |
| IL-1 $\beta$    | BC011437      | CACTCATTGTGGCTGTGGAGAA    | CCACGGGAAAAGACACAGGtAG       |
| IL-6            | NM_031168     | CTCTGGGAAAATCGTGAAATG     | AAGTGCATCATCGTTGTTTATACA     |
| CRP             | NM_007768     | GAAATTTCTTGTGTCATGTTGCA   | CCATCACTCTAGGTTGCCAAA        |
| SAA1            | NM_009117.3   | ATTTGTTACGAGGCTTCCAA      | CCGAGCATGGAAGTATTTGTC        |
| MCP1            | BC055070.1    | TCACCTGCTGTA CTACTCATTACC | CTCCAGCCTACTCATTGGGATC       |
| UCP1            | U63419        | ACTGGAGGTGTGGCAGTGTTT     | ACGACCTGTAGGCTGCCCAA         |
| UCP2            | NM_011672     | TGTTGATGTGGTCAAGACGAGAT   | CATGGTAAGGGCACAGTGA          |
| UCP3            | NM_009464     | CATCACAAGAAATGCCATTGTCA   | TCCAGCAAATTCTCCTTGATGA       |
| 36B4            | NM_007475     | GGACCCGAGAAGACCTCCT       | TCCAGGCTTTGGGCATCACC         |
